# Supplementary material for: Metabolic contrast agents produced from transported solid 13C-glucose hyperpolarized via dynamic nuclear polarization
Source: PubMed Central journal article supplement (PMC9814755; doi:10.1038/s42004-021-00536-9), 2021-06-23
Supplement: 42004_2021_536_MOESM1_ESM.pdf [file 42004_2021_536_MOESM1_ESM.pdf]

## **Description of Additional Supplementary Files**

**File Name:** Supplementary Movie 1

**Description:** The movie shows a demonstration of the extraction, transport and off-site dissolution of a long-relaxing hyperpolarized glucose sample
